# Supplementary material for: Recent advance in the discovery of tyrosinase inhibitors from natural sources via separation methods
Source: PubMed Central journal article supplement (PMC8480707; doi:10.1080/14756366.2021.1983559), 2021-09-27
Supplement: IENZ_A_1983559_SM1326.pdf [file IENZ_A_1983559_SM1326.pdf]

## **Recent advance in the discovery of tyrosinase inhibitors from natural sources via separation methods**

Xiao-wei Zhang<sup>1#</sup>, Guang-li Bian<sup>2#</sup>, Pei-ying Kang<sup>3#</sup>, Xin-jie Cheng<sup>2</sup>, Kai Yan<sup>4</sup>,

Yong-li Liu<sup>4</sup>, Yan-xia Gao<sup>4</sup>, De-qiang Li<sup>2\*</sup>

- <sup>1.</sup> Department of Neurological surgery, the Second Hospital of Hebei Medical University, No.215, Heping West Road, Shijiazhuang 050000, Hebei province, People's Republic of China
- <sup>2.</sup> Department of Pharmacy, the Second Hospital of Hebei Medical University, No.215, Heping West Road, Shijiazhuang 050000, Hebei province, People's Republic of China
- <sup>3.</sup> Department of Clinical Laboratory, the Second Hospital of Hebei Medical University, No.215, Heping West Road, Shijiazhuang 050000, Hebei province, People's Republic of China
- <sup>4.</sup> Institute for Drug Control of Hebei Province, No.219, Yuquan Road, Shijiazhuang 050011, Hebei province, People's Republic of China

# These authors contributed equally to this work.

\* Correspondence to: De-qiang Li, Department of Pharmacy, the Second Hospital of Hebei Medical University, No.215, Heping West Road, Shijiazhuang 050000, Hebei province, People's Republic of China.

E-mail: deqli@163.com (D.Q. Li). Tel: +86 0311 6663630

**Table 1S. The chemical structures of identified active compounds**

| No. | Classification | Compounds          | Chemical structure                                                                                                                                                                                                                                                                                                                                    |        |
|-----|----------------|--------------------|-------------------------------------------------------------------------------------------------------------------------------------------------------------------------------------------------------------------------------------------------------------------------------------------------------------------------------------------------------|--------|
| 1   | Flavonoids     | 3'-Hydroxypuerarin | 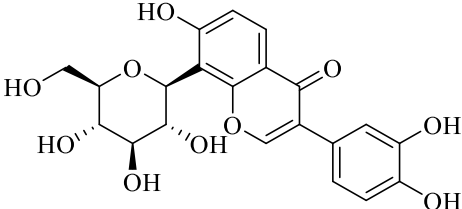                                                                                                                                                                                                                                                                    |        |
| 2   |                | Puerarin           |                                                                                                                                                                                                                                                                    |        |
|     |                |                    |  <p data-bbox="1075 1234 1433 1323">                     Gent = <math>\beta</math>-D-gentiobiosyl<br/>                     Glc = <math>\beta</math>-D-glucopyranosyl<br/>                     GlcA = <math>\beta</math>-D-glucuronopyranosyl                 </p> |        |
|     |                |                    | R1                                                                                                                                                                                                                                                                                                                                                    |        |
| 3   |                |                    | Oroxin B                                                                                                                                                                                                                                                                                                                                              | O-Gent |
| 4   |                |                    | Kaempferide-3-O- $\beta$ -D-gentiobioside                                                                                                                                                                                                                                                                                                             | OH     |
| 5   |                |                    | Chrysin-7-O- $\beta$ -D-gentiobioside                                                                                                                                                                                                                                                                                                                 | O-Gent |
| 6   |                |                    | Oroxin A                                                                                                                                                                                                                                                                                                                                              | O-Glc  |
| 7   |                |                    | Chrysin-7-O- $\beta$ -D-glucuronid                                                                                                                                                                                                                                                                                                                    | O-GlcA |
| 8   |                | Baicalein          | OH                                                                                                                                                                                                                                                                                                                                                    |        |
| 9   |                | Chrysin            | OH                                                                                                                                                                                                                                                                                                                                                    |        |

|    |                                                  |  |                                                                                                                                                                                            |       |                  |
|----|--------------------------------------------------|--|--------------------------------------------------------------------------------------------------------------------------------------------------------------------------------------------|-------|------------------|
|    |                                                  |  | 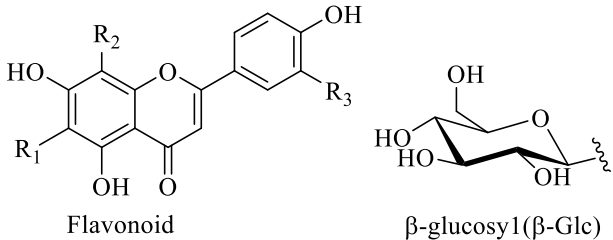 <p style="text-align: center;">Flavonoid <span style="margin-left: 200px;">β-glucosyl(β-Glc)</span></p> |       |                  |
|    |                                                  |  | R1                                                                                                                                                                                         | R2    | R3               |
| 10 | Isoorientin                                      |  | β-Glc                                                                                                                                                                                      | H     | OH               |
| 11 | Vitexin                                          |  | H                                                                                                                                                                                          | β-Glc | H                |
| 12 | Isovitexin                                       |  | β-Glc                                                                                                                                                                                      | H     | H                |
| 13 | Isoorientin 3'-methyl ether                      |  | β-Glc                                                                                                                                                                                      | H     | OCH <sub>3</sub> |
| 14 | Quercetin-3-O-(6-O-malonyl)-β-D-glucopyranoside  |  |  <p style="text-align: center;">Quercetin-3-O-(6-O-malonyl)-β-D-glucopyranoside</p>                     |       |                  |
| 15 | Kaempferol-3-O-(6-O-malonyl)-β-D-glucopyranoside |  |  <p style="text-align: center;">Kaempferol-3-O-(6-O-malonyl)-β-D-glucopyranoside</p>                   |       |                  |

|    |  |                                                                               |                                                                                                                                                                                             |
|----|--|-------------------------------------------------------------------------------|---------------------------------------------------------------------------------------------------------------------------------------------------------------------------------------------|
| 16 |  | Rutin                                                                         | 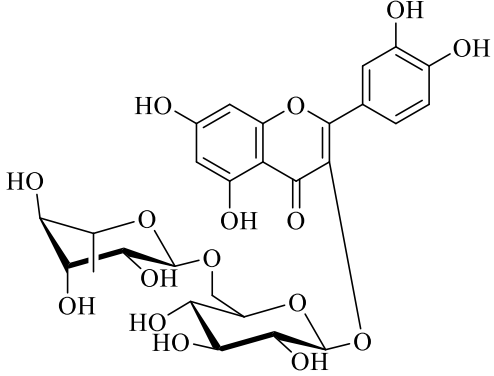 <p>Rutin</p>                                                                                             |
| 17 |  | Isoquercitrin                                                                 |  <p>Isoquercitrin</p>                                                                                    |
| 18 |  | Astragalin                                                                    |  <p>Astragalin</p>                                                                                      |
| 19 |  | Kaempferol-3-O- $\alpha$ -L-rhamnopyranosyl-(1-6)- $\beta$ -D-glucopyranoside |  <p>Kaempferol-3-O-<math>\alpha</math>-L-rhamnopyranosyl-(1-6)-<math>\beta</math>-D-glucopyranoside</p> |

|    |  |                                                             |                                                                                                                                                         |                |                  |
|----|--|-------------------------------------------------------------|---------------------------------------------------------------------------------------------------------------------------------------------------------|----------------|------------------|
|    |  |                                                             | 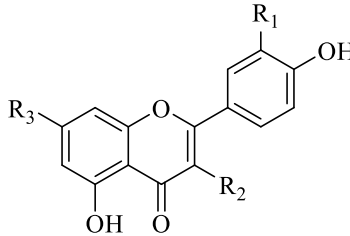 <p>Flavones/flavonols</p>                                            |                |                  |
|    |  |                                                             | R1                                                                                                                                                      | R2             | R3               |
| 20 |  | Hyperoside                                                  | OH                                                                                                                                                      | OGal           | OH               |
| 21 |  | Quercetin-3-O-xyloside                                      | OH                                                                                                                                                      | OXyl           | OH               |
| 22 |  | Luteolin-7-O-glucoside                                      | OH                                                                                                                                                      | H              | OGlc             |
| 23 |  | Quercetin-3-O-arapyranoside                                 | OH                                                                                                                                                      | OArapyranoside | OH               |
| 24 |  | Quercetin-3-O-arafuranoside                                 | OH                                                                                                                                                      | OArafuranoside | OH               |
| 25 |  | Kaempferol-3-O-glucoside                                    | H                                                                                                                                                       | OGlc           | OH               |
| 26 |  | Quercetin-3-O-rhamnoside                                    | OH                                                                                                                                                      | ORha           | OH               |
| 27 |  | 7-O-Methyl quercetin-3-O-rhamnoside                         | OH                                                                                                                                                      | ORha           | OCH <sub>3</sub> |
| 28 |  | 1, 2, 6-Trihydroxy-5-methoxy-7-(3-methylbut-2-enyl)xanthone |  <p>1, 2, 6-Trihydroxy-5-methoxy-7-(3-methylbut-2-enyl)xanthone</p> |                |                  |
| 29 |  | 7-Hydroxy-2-(2-hydroxypropyl)-5-methyl-benzopyran-γ-one     |  <p>7-Hydroxy-2-(2-hydroxypropyl)-5-methyl-benzopyran-γ-one</p>    |                |                  |
| 30 |  | 1, 4, 5, 6-Tetrahydroxy-7,8-bis(3-methylbut-2-enyl)xanthone |  <p>1, 4, 5, 6-Tetrahydroxy-7,8-bis(3-methylbut-2-enyl)xanthone</p> |                |                  |

|    |             |                         |                                                                                                      |
|----|-------------|-------------------------|------------------------------------------------------------------------------------------------------|
| 31 |             | Kuwanon G               | 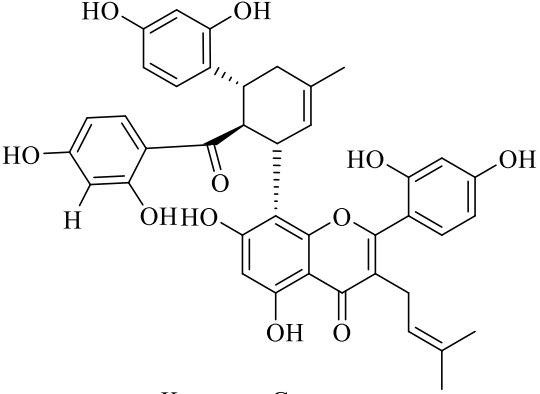 <p>Kuwanon G</p>  |
| 32 |             | Kuwanon H               |  <p>Kuwanon H</p> |
| 33 | Isoflavones | Puerarin-6''-O-xyloside |                  |
| 34 |             | Daidzin                 |                  |
| 35 |             | Genistin                |                  |

|    |                         |                                                                                                                 |      |              |
|----|-------------------------|-----------------------------------------------------------------------------------------------------------------|------|--------------|
| 36 | 6"-O-acetyldaidzin      | 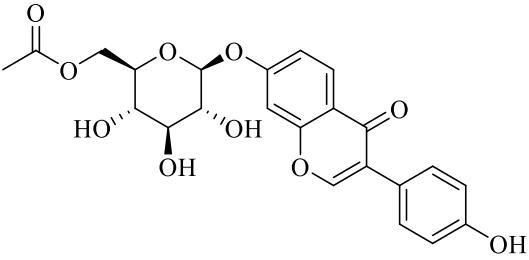                              |      |              |
| 37 | Daidzein                |                               |      |              |
|    |                         |                               |      |              |
|    |                         | R1                                                                                                              | R2   | R3           |
| 38 | Mirificin               | H                                                                                                               | OH   | Glc(6,1)-APi |
| 39 | Genistinc               | OH                                                                                                              | OGlc | H            |
| 40 | Licoarylcoumarin        |                              |      |              |
| 41 | Puerarin-4'-O-glucoside | <br>puerarin-4'-O-glucoside |      |              |

|    |                       |                                                                                                                                      |                                                                                                               |
|----|-----------------------|--------------------------------------------------------------------------------------------------------------------------------------|---------------------------------------------------------------------------------------------------------------|
| 42 |                       | 3'-Methoxy puerarin                                                                                                                  | 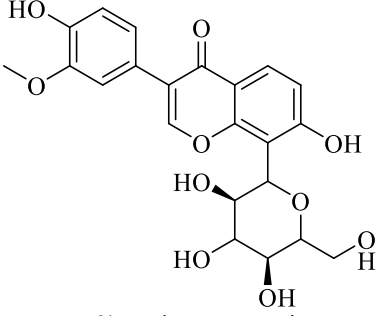 <p>3'-methoxy puerarin</p> |
| 43 |                       | Puerarin apioside                                                                                                                    |  <p>puerarin apioside</p>   |
| 44 |                       | Glabridin                                                                                                                            |                           |
| 45 |                       | Naringenin                                                                                                                           |                           |
|    | Dihydroflavono<br>ids |  <p>Xanthenes                      R=Galloyl</p> |                                                                                                               |
| 46 |                       | Mangiferin                                                                                                                           | R1<br>Glc                      R2<br>H                                                                        |
| 47 |                       | 6'-O-Galloyl-mangiferin                                                                                                              | 6'-O-Galloylglc                      H                                                                        |
| 48 |                       | Isomangiferin                                                                                                                        | H                      Glc                                                                                    |
| 49 |                       | 6'-O-(p-Hydroxybenzoyl)<br>mangiferin                                                                                                | 6'-O-p-Hydroxybenzoylglc, R <sub>z</sub> =H                      H                                            |



|    |                  |                              |                                                                                                                                                                         |                   |                   |
|----|------------------|------------------------------|-------------------------------------------------------------------------------------------------------------------------------------------------------------------------|-------------------|-------------------|
|    |                  |                              | 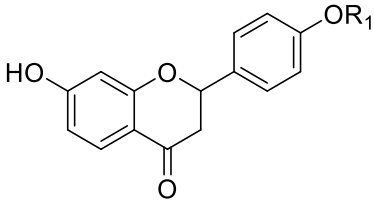                                                                                      |                   |                   |
|    |                  |                              | R1                                                                                                                                                                      |                   |                   |
| 50 |                  | Liquiritin apioside          | APi-Glc                                                                                                                                                                 |                   |                   |
| 51 |                  | Liquiritigenin               | H                                                                                                                                                                       |                   |                   |
| 52 |                  | Chrysoeriol                  |                                                                                       |                   |                   |
|    |                  |                              |                                                                                      |                   |                   |
|    |                  |                              | R1                                                                                                                                                                      | R2                | R3                |
| 53 |                  | Dihydrodaidzein              | H                                                                                                                                                                       | H                 | OH                |
| 54 |                  | Glycyrrhisoflavanone         | OCH3                                                                                                                                                                    | 7-O-(CH3)2CH=CH-8 | 7-O-(CH3)2CH=CH-8 |
|    |                  |                              |                                                                                     |                   |                   |
|    |                  |                              | R1                                                                                                                                                                      | R2                |                   |
| 55 |                  | Formononetin                 | H                                                                                                                                                                       | H                 |                   |
| 56 |                  | Pratensein                   | OH                                                                                                                                                                      | OH                |                   |
|    | Phenols          |                              |  <p style="text-align: center;">Quinic acid                      Caffeoyl group</p> |                   |                   |
|    |                  |                              | R1                                                                                                                                                                      | R2                | R3                |
| 57 |                  | 3,5-Di-O-caffeoylquinic acid | H                                                                                                                                                                       | Caffeoyl          | Caffeoyl          |
| 58 |                  | 1,5-Di-O-caffeoylquinic acid | Caffeoyl                                                                                                                                                                | H                 | Caffeoyl          |
| 59 | Chlorogenic acid | H                            | Caffeoyl                                                                                                                                                                | H                 |                   |

|    |  |                              |                                                                                                                       |
|----|--|------------------------------|-----------------------------------------------------------------------------------------------------------------------|
| 60 |  | Cryptochlorogenic acid       | 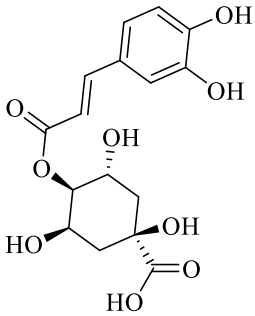 <p>Cryptochlorogenic acid</p>     |
| 61 |  | 3,4-Dicaffeoylquinic acid    |  <p>3,4-Dicaffeoylquinic acid</p>   |
| 62 |  | 3,5-Dicaffeoylquinic acid    |  <p>3,5-Dicaffeoylquinic acid</p>  |
| 63 |  | 4,5-Dicaffeoylquinic acid    |  <p>4,5-Dicaffeoylquinic acid</p> |
| 64 |  | 4,4'-Dihydroxydiphenyl ether |                                   |

|    |                                     |                                                                                                                                    |             |         |         |         |
|----|-------------------------------------|------------------------------------------------------------------------------------------------------------------------------------|-------------|---------|---------|---------|
| 65 | 4-(1-(4-hydroxyphenyl)phenyl)Phenol | 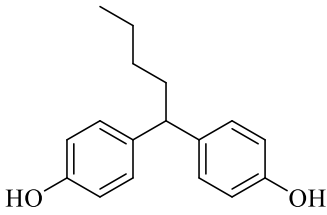                                                 |             |         |         |         |
| 66 | 4,4'-Methylenediphenol              |                                                  |             |         |         |         |
| 67 | 2,4-Bis(4-hydroxybenzyl)phenol      |                                                  |             |         |         |         |
| 68 | 4-Hydroxybenzyl methyl ether        |                                                 |             |         |         |         |
|    |                                     |  <p>Galloylated quinic acids      R=Galloyl</p> |             |         |         |         |
|    |                                     | R1                                                                                                                                 | R2          |         |         |         |
| 69 | 3-O-Galloyl quinic acid             | Galloyl                                                                                                                            | H           |         |         |         |
| 70 | 3,5-Di-O-galloyl quinic acid        | Galloyl                                                                                                                            | Galloyl     |         |         |         |
| 71 | 5-O-Digalloyl quinic acid           | H                                                                                                                                  | 5-Digalloyl |         |         |         |
|    |                                     |  <p>Gallotannins      R=Galloyl</p>            |             |         |         |         |
|    |                                     | R1                                                                                                                                 | R2          | R3      | R4      | R5      |
| 72 | 1,4,6-Tri-O-galloyl glucoside       | Galloyl                                                                                                                            | H           | H       | Galloyl | Galloyl |
| 73 | 1,3,4,6-Tetra-O-galloyl glucoside   | Galloyl                                                                                                                            | Galloyl     | H       | Galloyl | Galloyl |
| 74 | 1,2,3,4,6-Penta-O-galloyl glucoside | Galloyl                                                                                                                            | Galloyl     | Galloyl | Galloyl | Galloyl |

| 75                              | 3-O-Galloyl shikimic acid                 | 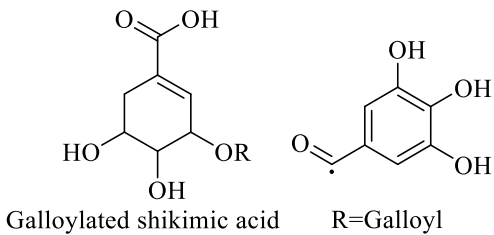 <p>Galloylated shikimic acid      R=Galloyl</p>                                                                                                                                                                                                                                                                      |         |         |    |   |   |   |                                 |   |   |   |         |   |                                 |   |         |
|---------------------------------|-------------------------------------------|---------------------------------------------------------------------------------------------------------------------------------------------------------------------------------------------------------------------------------------------------------------------------------------------------------------------------------------------------------------------------------------------------------|---------|---------|----|---|---|---|---------------------------------|---|---|---|---------|---|---------------------------------|---|---------|
| 76                              | Epicatechin gallate                       |  <p>Galloylated catechin</p>                                                                                                                                                                                                                                                                                          |         |         |    |   |   |   |                                 |   |   |   |         |   |                                 |   |         |
| 77                              | Ethyl 2,4-dihydroxy-3-galloyl Oxybenzoate |                                                                                                                                                                                                                                                                                                                      |         |         |    |   |   |   |                                 |   |   |   |         |   |                                 |   |         |
|                                 |                                           |                                                                                                                                                                                                                                                                                                                     |         |         |    |   |   |   |                                 |   |   |   |         |   |                                 |   |         |
|                                 |                                           | <table border="1" style="width: 100%; text-align: center;"> <thead> <tr> <th>R1</th> <th>R2</th> <th>R3</th> </tr> </thead> <tbody> <tr> <td>H</td> <td>H</td> <td>H</td> </tr> <tr> <td>CH<sub>2</sub>CH<sub>3</sub></td> <td>H</td> <td>H</td> </tr> <tr> <td>H</td> <td>Galloyl</td> <td>H</td> </tr> <tr> <td>CH<sub>2</sub>CH<sub>3</sub></td> <td>H</td> <td>Galloyl</td> </tr> </tbody> </table> | R1      | R2      | R3 | H | H | H | CH <sub>2</sub> CH <sub>3</sub> | H | H | H | Galloyl | H | CH <sub>2</sub> CH <sub>3</sub> | H | Galloyl |
| R1                              | R2                                        | R3                                                                                                                                                                                                                                                                                                                                                                                                      |         |         |    |   |   |   |                                 |   |   |   |         |   |                                 |   |         |
| H                               | H                                         | H                                                                                                                                                                                                                                                                                                                                                                                                       |         |         |    |   |   |   |                                 |   |   |   |         |   |                                 |   |         |
| CH <sub>2</sub> CH <sub>3</sub> | H                                         | H                                                                                                                                                                                                                                                                                                                                                                                                       |         |         |    |   |   |   |                                 |   |   |   |         |   |                                 |   |         |
| H                               | Galloyl                                   | H                                                                                                                                                                                                                                                                                                                                                                                                       |         |         |    |   |   |   |                                 |   |   |   |         |   |                                 |   |         |
| CH <sub>2</sub> CH <sub>3</sub> | H                                         | Galloyl                                                                                                                                                                                                                                                                                                                                                                                                 |         |         |    |   |   |   |                                 |   |   |   |         |   |                                 |   |         |
| 78                              | Gallic acid                               | H                                                                                                                                                                                                                                                                                                                                                                                                       | H       | H       |    |   |   |   |                                 |   |   |   |         |   |                                 |   |         |
| 79                              | Ethyl gallate                             | CH <sub>2</sub> CH <sub>3</sub>                                                                                                                                                                                                                                                                                                                                                                         | H       | H       |    |   |   |   |                                 |   |   |   |         |   |                                 |   |         |
| 80                              | Digallic acid                             | H                                                                                                                                                                                                                                                                                                                                                                                                       | Galloyl | H       |    |   |   |   |                                 |   |   |   |         |   |                                 |   |         |
| 81                              | Ethyl digallate                           | CH <sub>2</sub> CH <sub>3</sub>                                                                                                                                                                                                                                                                                                                                                                         | H       | Galloyl |    |   |   |   |                                 |   |   |   |         |   |                                 |   |         |
| 82                              | Protocatechuic acid                       |                                                                                                                                                                                                                                                                                                                    |         |         |    |   |   |   |                                 |   |   |   |         |   |                                 |   |         |
| 83                              | Neolicuroside                             |                                                                                                                                                                                                                                                                                                                     |         |         |    |   |   |   |                                 |   |   |   |         |   |                                 |   |         |

|    |  |                               |                                                                                                                           |
|----|--|-------------------------------|---------------------------------------------------------------------------------------------------------------------------|
| 84 |  | Liquiritin                    | 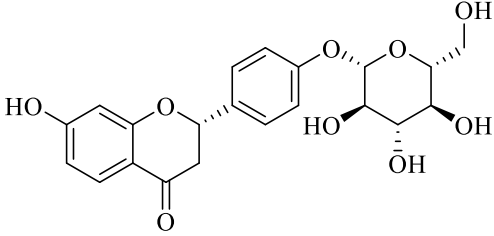 <p>Liquiritin</p>                      |
| 85 |  | Ononin                        |                                         |
| 86 |  | 3'-Hydroxy puerarin           |  <p>3'-hydroxy puerarin</p>            |
| 87 |  | Oxyresveratrol                |                                       |
| 88 |  | Veraphenol-4'-O-β-D-glycoside |  <p>Veraphenol-4'-O-β-D-glycoside</p> |

|    |  |                                    |                                                                                                                              |
|----|--|------------------------------------|------------------------------------------------------------------------------------------------------------------------------|
| 89 |  | 2-O-cinnamyl-galloyl glucose       | 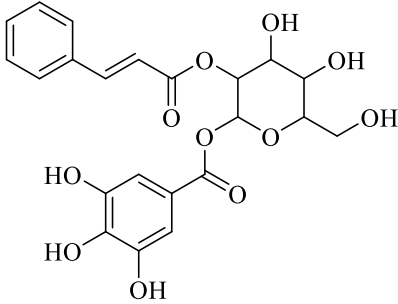 <p>2-O-cinnamyl-galloyl glucose</p>       |
| 90 |  | 1, 6-Digalloyl-2-cinnamoyl glucose |  <p>1, 6-Digalloyl-2-cinnamoyl glucose</p> |
| 91 |  | Protocatechuic aldehyde            |  <p>Protocatechuic aldehyde</p>         |
| 92 |  | Hydroxysafor yellow A              |  <p>Hydroxysafor yellow A</p>            |

|     |                        |                                                     |                                                                                                                                        |                  |    |         |
|-----|------------------------|-----------------------------------------------------|----------------------------------------------------------------------------------------------------------------------------------------|------------------|----|---------|
| 93  |                        | Mulberrofuran G                                     | 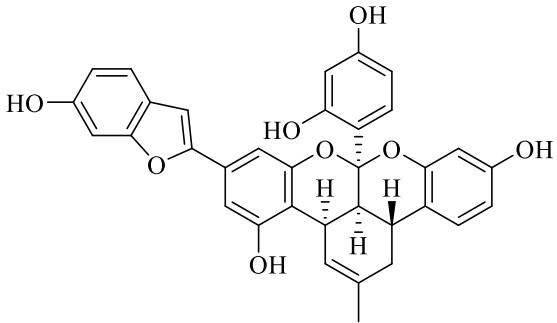 <p>Mulberrofuran G</p>                              |                  |    |         |
| 94  | Organic acid           | 3-(5-Hydroxybenzofuran-6-yl) propanoic acid         |  <p>3-(5-hydroxybenzofuran-6-yl) propanoic acid</p> |                  |    |         |
| 95  | Alkaloids              | 9-Octadecenamide, (trans-)                          |                                                     |                  |    |         |
| 96  |                        | 9-Octadecenamide, (cis-)                            |                                                    |                  |    |         |
|     |                        |                                                     |  <p>Benzophenones<br/>R=Galloyl</p>                |                  |    |         |
|     |                        |                                                     | R1                                                                                                                                     |                  |    |         |
| 97  | Glycosides<br>Quinones | Iriflophenone 3-C-glucoside                         | H                                                                                                                                      | R2               | R3 | R4      |
| 98  |                        | Iriflophenone 3-C-(2'-O-galloyl)-glucoside          | H                                                                                                                                      | H                | H  | H       |
| 99  |                        | Maclurin 3-C-(2'-O-p-hydroxybenzoyl)-glucoside      | OH                                                                                                                                     | Galloyl          | H  | H       |
| 100 |                        | Iriflophenone 3-C-(2',6'-di-O-galloyl)-glucoside    | H                                                                                                                                      | p-Hydroxybenzoyl | H  | H       |
| 101 |                        | Iriflophenone 3-C-(2'-O-p-hydroxybenzoyl)-glucoside | H                                                                                                                                      | Galloyl          | H  | Galloyl |

|     |  |                                                         |    |                                                                                      |         |         |         |
|-----|--|---------------------------------------------------------|----|--------------------------------------------------------------------------------------|---------|---------|---------|
|     |  | side                                                    |    |                                                                                      |         |         |         |
| 102 |  | Maclurin<br>3-C-(2'-O-galloyl)-glucoside                | OH | p-Hydroxybenzoyl                                                                     | H       | H       |         |
| 103 |  | Maclurin 3-C-(2',3'-di-O-galloyl)-glucoside             | OH | Galloyl                                                                              | H       | H       |         |
| 104 |  | Iriflophenone<br>3-C-(2',3',6'-tri-O-galloyl)-glucoside | H  | Galloyl                                                                              | Galloyl | H       |         |
|     |  |                                                         |    | 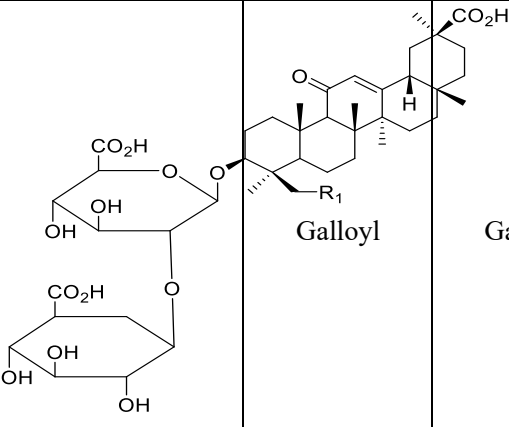   | Galloyl | Galloyl | Galloyl |
|     |  |                                                         |    | R1                                                                                   |         |         |         |
| 105 |  | Licorice saponin G2                                     |    | OH                                                                                   |         |         |         |
| 106 |  | Albiforin                                               |    |  |         |         |         |
| 107 |  | Paeoniforin                                             |    |  |         |         |         |



|     |                        |                               |                                                                                                                                   |
|-----|------------------------|-------------------------------|-----------------------------------------------------------------------------------------------------------------------------------|
| 108 |                        | Tanshinone IIA                | 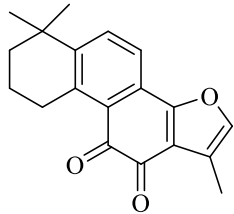 <p>Tanshinone IIA</p>                         |
| 109 | Quinones<br>Terpenoids | Emodin methyl ether           |  <p>Emodin methyl ether</p>                     |
| 110 |                        | $\omega$ -Hydroxy aloe-emodin |  <p><math>\omega</math>-Hydroxy aloe-emodin</p> |
| 111 |                        | Emodin                        |  <p>Emodin</p>                                |
| 112 |                        | $\alpha$ -Santalol            |                                              |
| 113 | Others                 | 1,3-Digalleoyl acetone        |                                              |
| 114 | Others                 | Kojic acid                    |                                              |
| 115 |                        | Cinnamaldehyde                |                                              |

|     |                                                                        |                                                                                      |
|-----|------------------------------------------------------------------------|--------------------------------------------------------------------------------------|
| 116 | 5-Hydroxymethyl-furfural                                               | 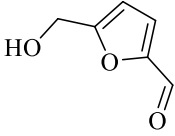  |
| 117 | Octadecanoic acid, 2,3-Dihydroxypropyl ester                           |    |
| 118 | 4,4'-Dimethoxydiphenyl methane                                         |    |
| 119 | 12-15 Heneicosadienoic acid, Octadecanoic acid, 2-Hydroxypropyl esters |    |
| 120 | 3-(4-tert-butylphenyl)-2-Methylpropanal                                |   |
| 121 | 4,4'-Dihydroxybenzylsulfid                                             |  |
| 122 | Octadecanoic acid, 2-Hydroxy-1-(hydroxymethyl)ethyl ester              |  |
